# Supplementary material for: Inhibition of pSTAT1 by tofacitinib accounts for the early improvement of experimental chronic synovitis
Source: PubMed Central journal article supplement (PMC6352431; doi:10.1186/s12950-019-0206-2), 2019-01-29

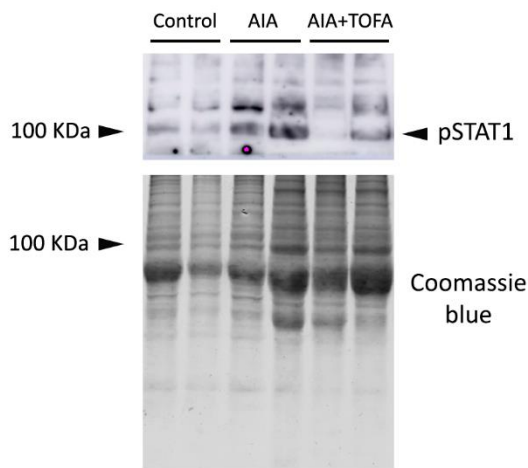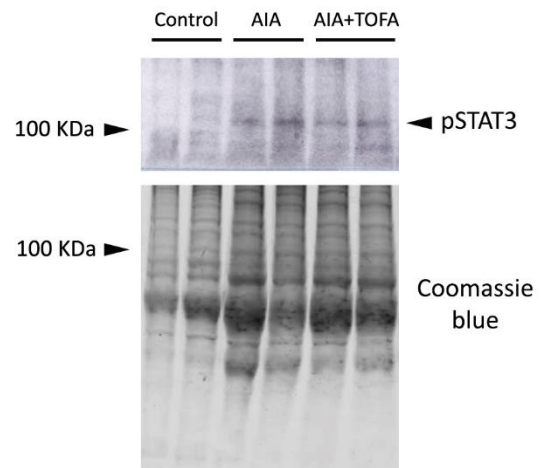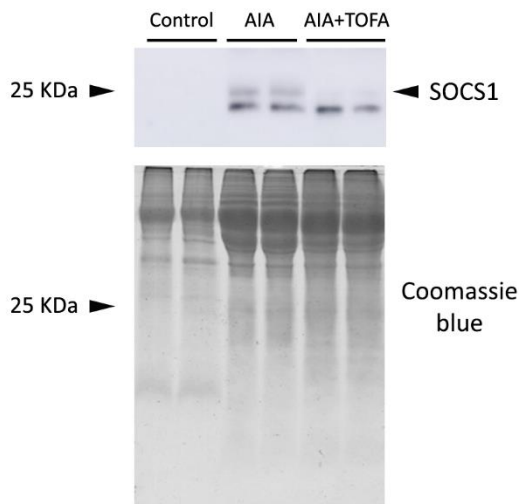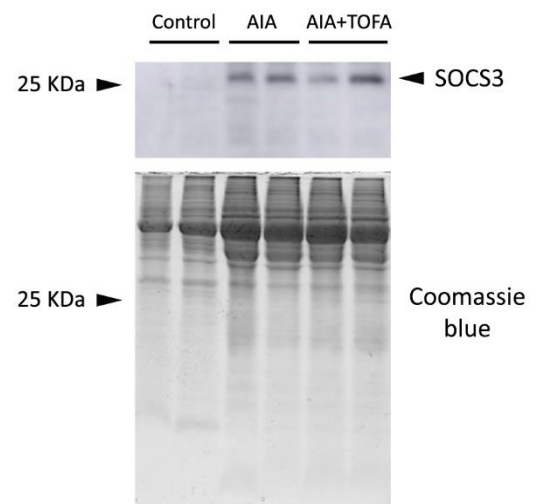

Supplement: 12950_2019_206_MOESM1_ESM.pdf [file 12950_2019_206_MOESM1_ESM.pdf]
